# Supplementary figures and images for: Physical stratigraphy and geotechnical properties controlling the local seismic response in explosive volcanic settings: the Stracciacappa maar (central Italy)
Source: Springer Nature journal article supplement (doi:10.1007/s10064-020-01925-5), 2020-07-24

# AMBIENT NOISE RECORDS

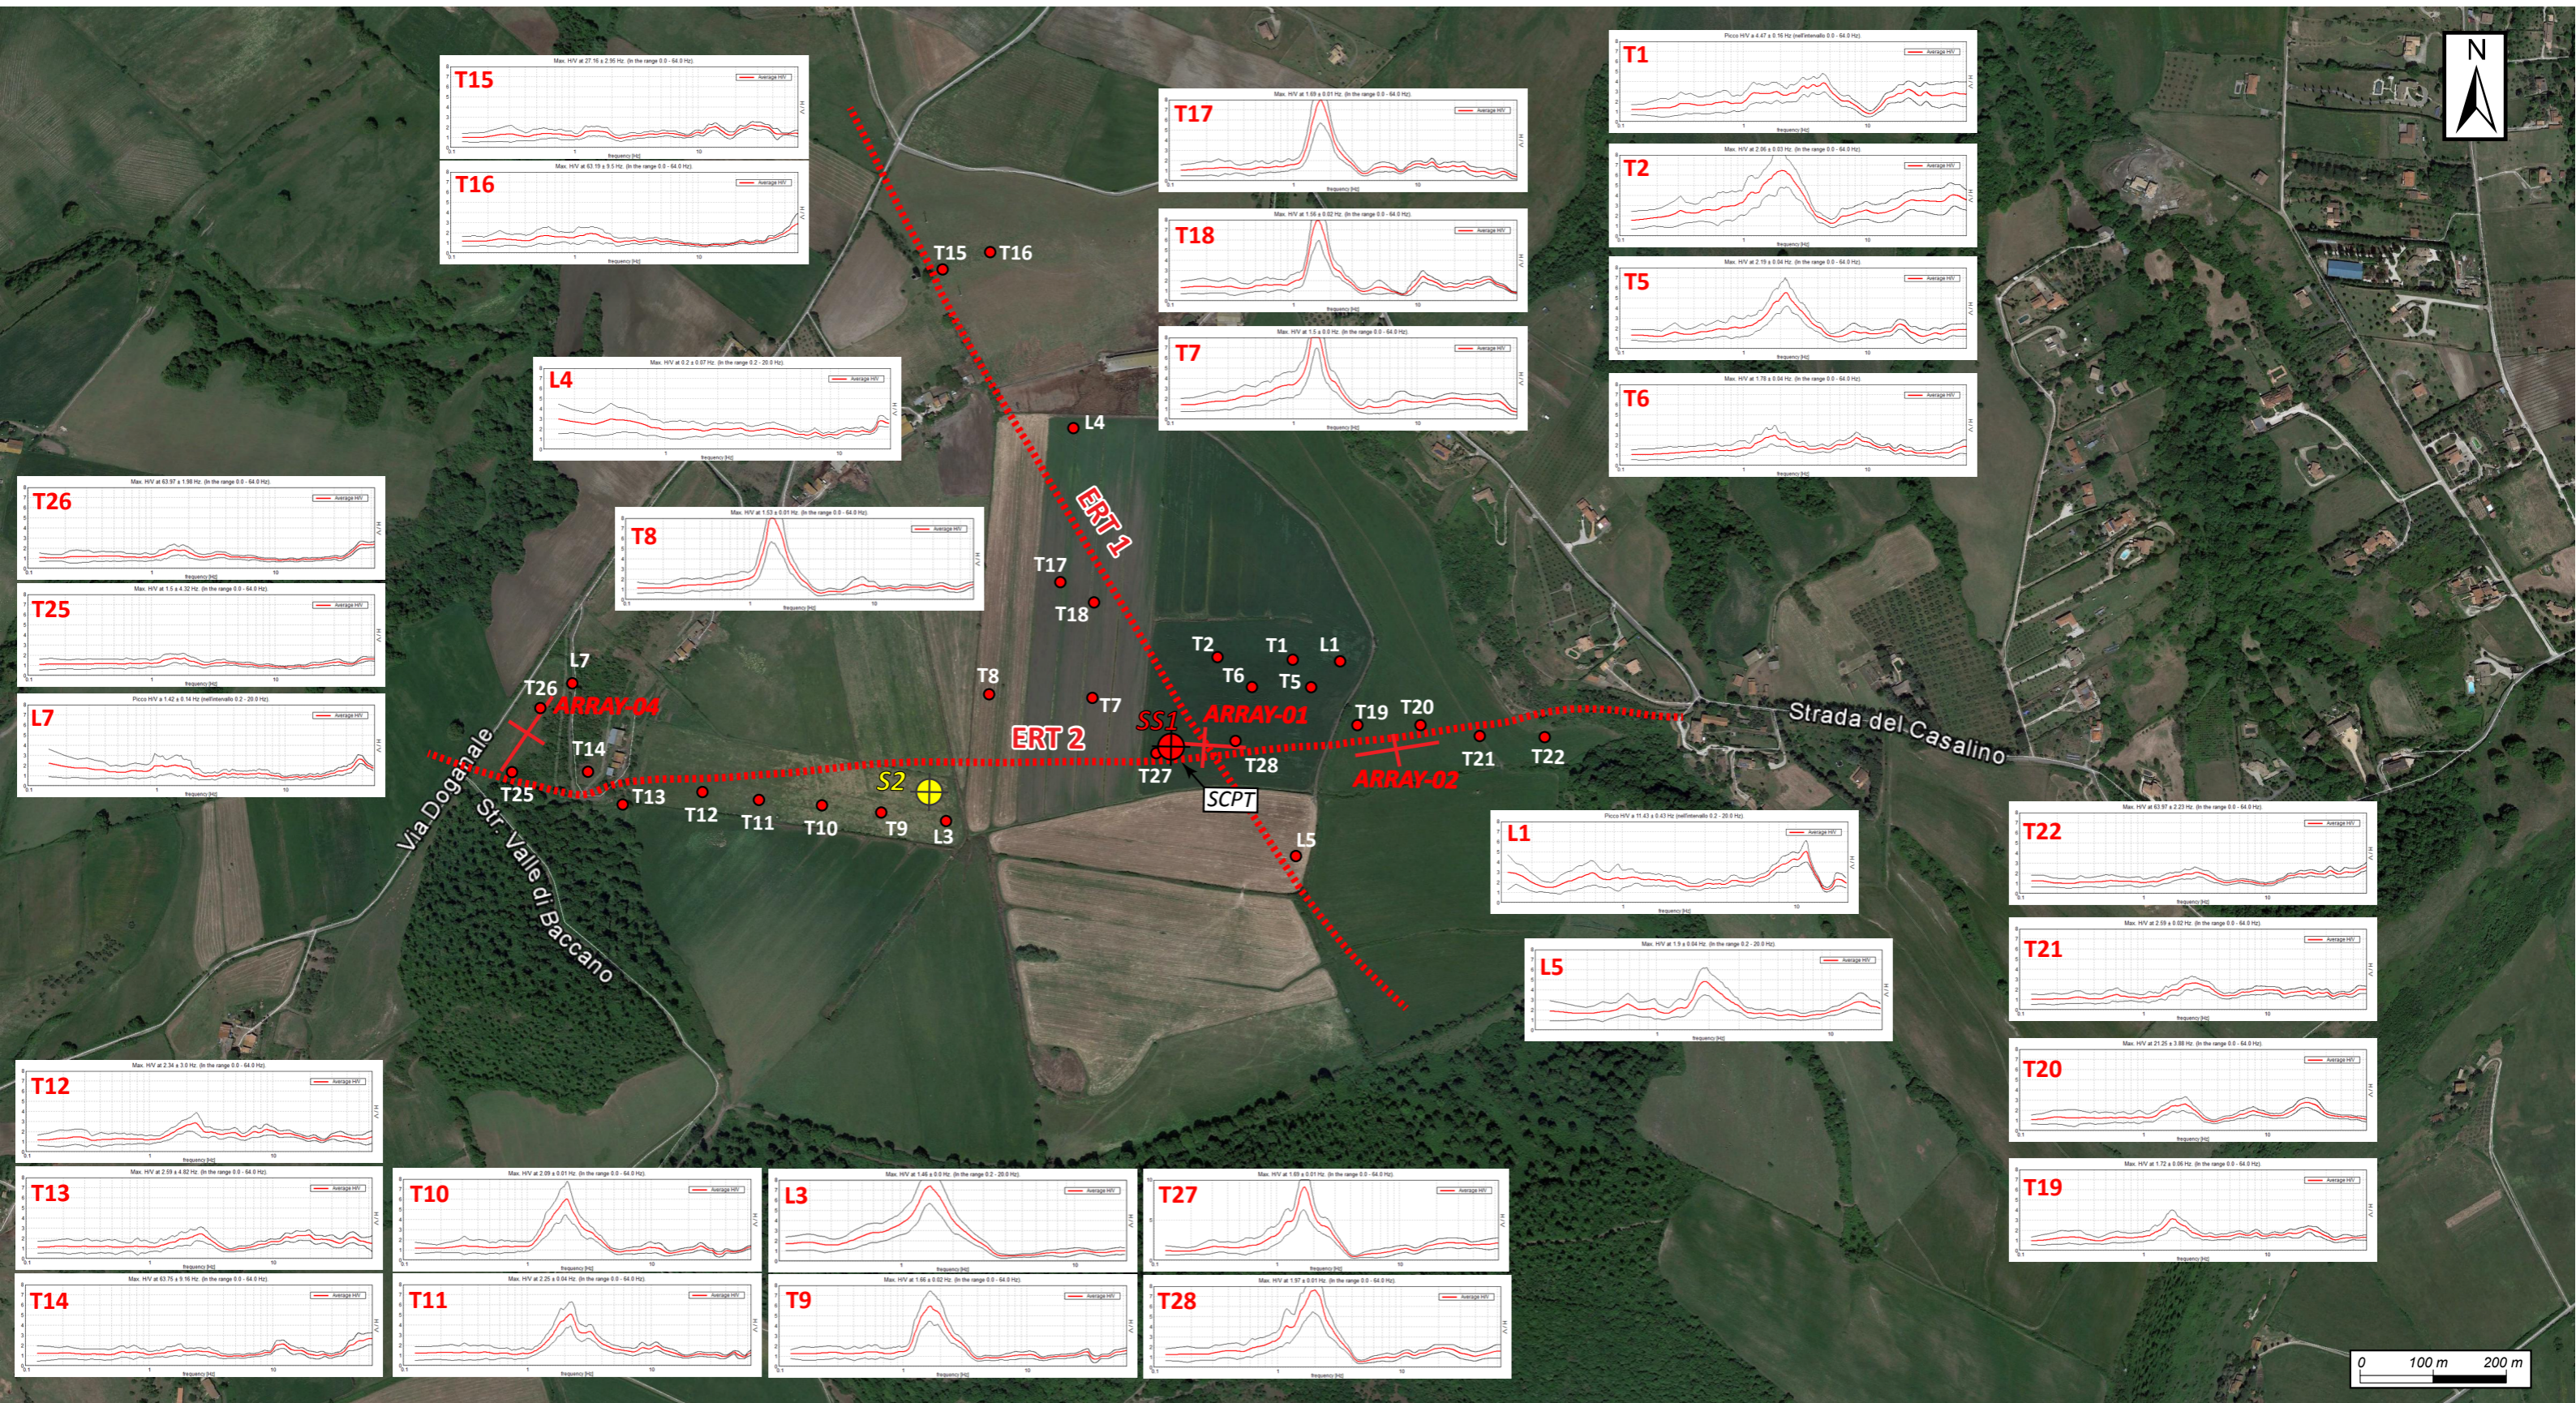

Supplement: MOESM1 [file 18214168]
